# Supplementary material for: Amplified cooling of Snowball Earth from a salt–albedo feedback
Source: Copernicus journal article supplement (doi:10.5194/egusphere-2026-679), 2026-02-24
Supplement: Supplementary file [file egusphere-2026-679-AC1-supplement.pdf]

# Including CO<sub>2</sub> on the x-axis

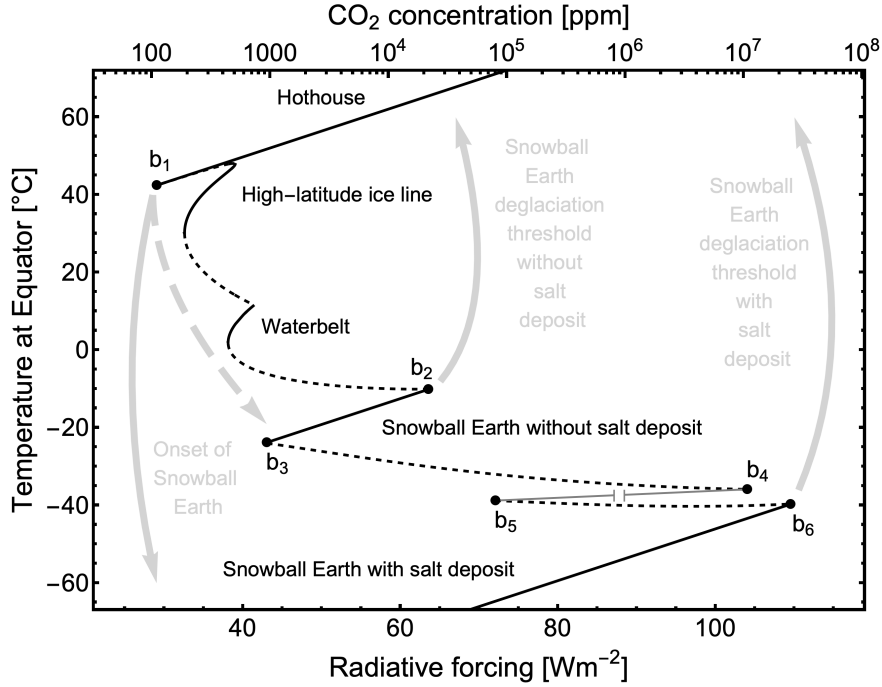

Figure 1: Bifurcation diagram for the EBM with a salt-albedo feedback (Eq. (1) with the albedo function in Eq. (2) from the manuscript). Radiative forcing on the x-axis is defined as  $\Delta A = A_0 - A$ , where  $A_0$  is the reference value given in Tab. 1. The top x-axis shows approximate atmospheric CO<sub>2</sub> concentrations (derived in below). Black solid lines indicate stable equilibrium states and dashed lines indicate unstable states. Stable climate states are labeled. Gray solid arrows show transitions in the Snowball Earth hysteresis. The dashed arrow indicates the unfeasible transition from a warm climate to a Snowball Earth without salt deposits. Model parameters are given in Tab. 1. The gray line between point  $b_4$  and  $b_5$  represents a truncation where Snowball Earth states with multiple salt deposits are omitted, the situation here is analogous to the complicated ice distributions reported in Samuelsberg and Jakobsen (2025). These solutions are unstable.

## Estimating CO<sub>2</sub> concentrations from radiative forcing

We can relate the radiative forcing  $\Delta A$  to an approximate increase in atmospheric CO<sub>2</sub>. The increase in radiative forcing  $\Delta A$  associated with changing the CO<sub>2</sub> concentrations from a reference level  $pC_0$  (in ppm) to  $pC_1$ , can be estimated by

$$\Delta A = k \ln \left( \frac{pC_1}{pC_0} \right), \quad (1)$$

where  $k = 6.0 \text{ W m}^{-2}$  (Liu and Peltier 2010). Choosing a suitable reference level with Neoproterozoic model parameters is problematic. Here we have chosen to use the modern climate as a reference point. Following North (1975), we fix the ice-line latitude at 72°N, corresponding to the modern climate, and assign the associated  $A$  value to the reference level  $pC_0$ . We set  $pC_0 = 330 \text{ ppm}$  and determine  $pC_1$  using Eq. (1), which is displayed on the top x-axis in Fig. 1. The reliability of these concentrations is questionable, considering the changes in solar insolation from the Neoproterozoic to today. Adjusting the  $A$  value associated with  $pC_0$  to account for these changes was not found to improve the CO<sub>2</sub> estimates. We observe that the bifurcation point  $b_2$  in Fig. 1 is consistent with the range of deglaciation thresholds reported in the simulations of Wu and Liu (2024). However, the

concentrations at the Snowball Earth initiation  $b_1$  are likely too low. Initial concentrations for Snowball Earth are uncertain, but estimates have found it to be around  $10^3$  ppm (Mills et al. 2019).

Considering these issues, we believe the second x-axis in Fig. 1 with  $\text{CO}_2$  concentrations can be misleading to readers. Reading Fig. 1 with the second axis, one may get the impression that specific  $\text{CO}_2$  concentrations correspond to points in the bifurcation diagram, representing a given model output for a given  $\text{CO}_2$  input. Including a realistic  $\text{CO}_2$  treatment would require extending the model formulation, which lies beyond the scope of the present work. We therefore choose to omit considerations of  $\text{CO}_2$  concentrations in the final manuscript.

## References

- Liu, Yonggang and W Richard Peltier (2010). “A carbon cycle coupled climate model of Neoproterozoic glaciation: Influence of continental configuration on the formation of a “soft snowball””. In: *Journal of Geophysical Research: Atmospheres* 115.D17.
- Mills, Benjamin JW et al. (2019). “Modelling the long-term carbon cycle, atmospheric  $\text{CO}_2$ , and Earth surface temperature from late Neoproterozoic to present day”. In: *Gondwana Research* 67, pp. 172–186.
- North, Gerald R (1975). “Analytical solution to a simple climate model with diffusive heat transport”. In: *Journal of Atmospheric Sciences* 32.7, pp. 1301–1307.
- Samuelsberg, Aksel and Per Kristen Jakobsen (2025). “Slushball Earth equilibria in a one-dimensional energy balance model”. In: *Physica D: Nonlinear Phenomena*, p. 134866.
- Wu, Jiacheng and Yonggang Liu (2024). “Influence of Orbital forcing on the snowball Earth deglaciation”. In: *Geophysical Research Letters* 51.20, e2024GL111326.
